# Supplementary material
Source: HighWire-hosted journal article supplement (https://ejhp.bmj.com/highwire/filestream/150336/field_highwire_adjunct_files/4/ejhpharm-2021-002747supp005_data_supplement.pdf)

**SUPPLEMENTARY FILE 5**

**Sterile holder for syringes and needles, which can be used inside LAF/SC instead of a sterile pad**

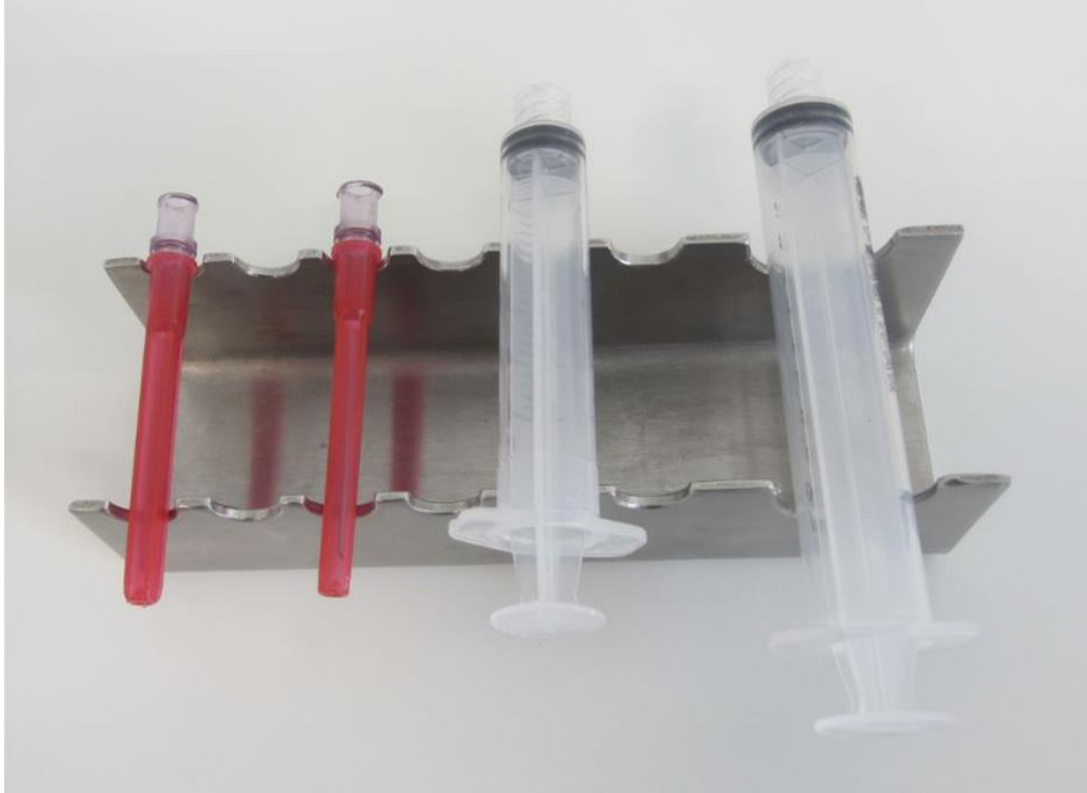

Supplement: ejhpharm-2021-002747supp005_data_supplement.pdf [file ejhpharm-2021-002747supp005_data_supplement.pdf]
